# Supplementary material
Source: publisher figshare collection journal article supplement (https://sage.figshare.com/ndownloader/files/16250747)
Supplement: Supplementary file 1 [file 16250747]

Dear Editor,

Thank you very much for your time and effort you have spent reviewing our paper. We believe that our manuscript has now improved by addressing to the comments from the reviewers. We have amended the manuscript accordingly, please see the following point-to-point response.

First, we'd like to emphasize the contributions: This paper designs joint Stackelberg game and matching strategy to improve efficiency of resource allocation in Smart Home. Adopting mobile edge computing, a hierarchical framework is established to meet demands of delay-sensitive applications.

To Reviewer 1:

1. In the introduction, specific measure about ‘how to design effective resource allocation strategy based on MEC in Smart Home’ is elaborated: To meet demands for high QoS and low-latency services of delay-sensitive applications, AP are deployed near the Smart Home system, forming a three-layered architecture. Applications can utilize computational and storage resources of AP to conduct tasks. Additionally, effective allocation strategy need to be designed, aiming to satisfy requirements of more applications with limited resources.
2. Explanation about why \lambda^k_j is related to the utility of UE in equation (4) is added: UE can gain reward in process of executing real-time tasks. The number of tasks is related to the workload arrival rate, λ_j.
3. The definition of the preference list has been modified. Different distances between MEC server and AP affect communication cost among them. And utility of MEC server is related to cost and renting price. Therefore, the value of preference over AP can be influenced by distances and renting prices.
4. English errors mentioned by the reviewer has been corrected and all changes are highlighted as requested. And we are sorry for the mistakes. Thanks for your guidance.

To Reviewer 2:

1. To improve technical depth, more background and justification are described in Introduction and Related Works.
2. Utility function of AP works in the proof of lemma 1. Through the deviation of the function, it can be deduced that the utility of AP is positive correlated with r_k, and then the optimal service price can be determined.
3. Lemma 2 proves that MEC server can obtain the maximum utility through the one-to-many matching.
4. Simulation results show the effectiveness of the proposed strategy compared with schemes based on auction game, and it presents performance with different system parameters changing in terms of utility of different objects. In this way, simulation results may be enough.
5. A) Explanations of Q_k^* has been supplemented, and confusing expressions have been corrected.

B) Since Section 3.2 is not well written, the section is reviewed and some ambiguity sentences are revised.

We apologize for typos, grammar mistakes, and unclear notations. They have been carefully fixed after reviewing and highlighted in the revised manuscripts with colored text. Thank you again for handling our manuscript. Please do let us know if further concerns are raised, so that we can make improvement correspondingly.

Best wishes,

Hu Xing.
